# Supplementary material for: Antioxidant and Anti-Inflammatory Activities of Barettin
Source: MDPI journal article supplement (doi:10.3390/md11072655), 2013-07-22
Supplement: s1 [file s1]

marinedrugs-11-02655-s001.mol
  corina  04141406413D 1   1.00000     0.00000 
CORINA 3.49 0023  12.04.2013
 26 28  0  0  0  0  0  0  0  0999 V2000
    0.2324    1.2146   -1.2204 C   0  0  0  0  0  0  0  0  0  0  0  0
    0.2051   -0.1401   -0.9196 C   0  0  0  0  0  0  0  0  0  0  0  0
    1.2934   -0.7512   -0.3335 C   0  0  0  0  0  0  0  0  0  0  0  0
    2.4313   -0.0077   -0.0389 C   0  0  0  0  0  0  0  0  0  0  0  0
    2.4567    1.3629   -0.3441 C   0  0  0  0  0  0  0  0  0  0  0  0
    1.3508    1.9674   -0.9360 C   0  0  0  0  0  0  0  0  0  0  0  0
    3.6458   -0.3284    0.5316 N   0  0  0  0  0  0  0  0  0  0  0  0
    4.4404    0.7718    0.6031 C   0  0  0  0  0  0  0  0  0  0  0  0
    3.7813    1.8496    0.0854 C   0  0  0  0  0  0  0  0  0  0  0  0
    6.5452    2.3969    0.0907 N   0  0  0  0  0  0  0  0  0  0  0  0
    5.6228    3.4576    0.0680 C   0  0  0  0  0  0  0  0  0  0  0  0
    4.2896    3.2193   -0.0226 C   0  0  0  0  0  0  0  0  0  0  0  0
    7.8087    2.6189    0.4871 C   0  0  0  0  0  0  0  0  0  0  0  0
    8.2853    3.9579    0.9584 C   0  0  0  0  0  0  0  0  0  0  0  0
    7.4029    5.0398    0.5471 N   0  0  0  0  0  0  0  0  0  0  0  0
    6.1386    4.8283    0.1453 C   0  0  0  0  0  0  0  0  0  0  0  0
    8.3715    3.9431    2.4859 C   0  0  0  0  0  0  0  0  0  0  0  0
    8.9750    5.2611    2.9755 C   0  0  0  0  0  0  0  0  0  0  0  0
    9.0612    5.2462    4.5030 C   0  0  0  0  0  0  0  0  0  0  0  0
    9.6390    6.5082    4.9718 N   0  0  0  0  0  0  0  0  0  0  0  0
    9.8152    6.7255    6.3179 C   0  0  0  0  0  0  0  0  0  0  0  0
   10.3575    7.9098    6.7578 N   0  0  0  0  0  0  0  0  0  0  0  0
   -1.3390   -1.1570   -1.3167 Br  0  0  0  0  0  0  0  0  0  0  0  0
    5.4254    5.7688   -0.1533 O   0  0  0  0  0  0  0  0  0  0  0  0
    8.5964    1.6966    0.4627 O   0  0  0  0  0  0  0  0  0  0  0  0
    9.4682    5.8087    7.1769 N   0  0  0  0  0  0  0  0  0  0  0  0
  1  2  2  0      
  2  3  1  0      
  3  4  2  0      
  4  5  1  0      
  5  6  2  0      
  6  1  1  0      
  4  7  1  0      
  7  8  1  0      
  8  9  2  0      
  5  9  1  0      
 10 11  1  0      
 11 12  2  0      
 12  9  1  0      
 10 13  1  0      
 13 14  1  0      
 14 15  1  0      
 15 16  1  0      
 16 11  1  0      
 14 17  1  0      
 17 18  1  0      
 18 19  1  0      
 19 20  1  0      
 20 21  1  0      
 21 22  1  0      
  2 23  1  0      
 16 24  2  0      
 13 25  2  0      
 21 26  2  0      
M  END
$$$$
