# Supplementary material for: Antioxidant and Anti-Inflammatory Activities of Barettin
Source: MDPI journal article supplement (doi:10.3390/md11072655), 2013-07-22
Supplement: s2 [file s2]

marinedrugs-11-02655-s001.mol
  ChemDraw01201408432D

 26 28  0  0  0  0  0  0  0  0999 V2000
   -4.6441    0.4125    0.0000 C   0  0  0  0  0  0  0  0  0  0  0  0
   -4.6441   -0.4125    0.0000 C   0  0  0  0  0  0  0  0  0  0  0  0
   -3.9296   -0.8250    0.0000 C   0  0  0  0  0  0  0  0  0  0  0  0
   -3.2151   -0.4125    0.0000 C   0  0  0  0  0  0  0  0  0  0  0  0
   -3.2151    0.4125    0.0000 C   0  0  0  0  0  0  0  0  0  0  0  0
   -3.9296    0.8250    0.0000 C   0  0  0  0  0  0  0  0  0  0  0  0
   -2.5006   -0.8250    0.0000 N   0  0  0  0  0  0  0  0  0  0  0  0
   -1.7862   -0.4125    0.0000 C   0  0  0  0  0  0  0  0  0  0  0  0
   -1.7862    0.4125    0.0000 C   0  0  0  0  0  0  0  0  0  0  0  0
   -0.3572   -0.4125    0.0000 N   0  0  0  0  0  0  0  0  0  0  0  0
   -0.3572    0.4125    0.0000 C   0  0  0  0  0  0  0  0  0  0  0  0
   -1.0717    0.8250    0.0000 C   0  0  0  0  0  0  0  0  0  0  0  0
    0.3572   -0.8250    0.0000 C   0  0  0  0  0  0  0  0  0  0  0  0
    1.0717   -0.4125    0.0000 C   0  0  0  0  0  0  0  0  0  0  0  0
    1.0717    0.4125    0.0000 N   0  0  0  0  0  0  0  0  0  0  0  0
    0.3572    0.8250    0.0000 C   0  0  0  0  0  0  0  0  0  0  0  0
    1.7862   -0.8250    0.0000 C   0  0  0  0  0  0  0  0  0  0  0  0
    2.5006   -0.4125    0.0000 C   0  0  0  0  0  0  0  0  0  0  0  0
    3.2151   -0.8250    0.0000 C   0  0  0  0  0  0  0  0  0  0  0  0
    3.9296   -0.4125    0.0000 N   0  0  0  0  0  0  0  0  0  0  0  0
    4.6441   -0.8250    0.0000 C   0  0  0  0  0  0  0  0  0  0  0  0
    5.3585   -0.4125    0.0000 N   0  0  0  0  0  0  0  0  0  0  0  0
   -5.3585   -0.8250    0.0000 Br  0  0  0  0  0  0  0  0  0  0  0  0
    0.3572    1.6500    0.0000 O   0  0  0  0  0  0  0  0  0  0  0  0
    0.3572   -1.6500    0.0000 O   0  0  0  0  0  0  0  0  0  0  0  0
    4.6441   -1.6500    0.0000 N   0  0  0  0  0  0  0  0  0  0  0  0
  1  2  2  0      
  2  3  1  0      
  3  4  2  0      
  4  5  1  0      
  5  6  2  0      
  6  1  1  0      
  4  7  1  0      
  7  8  1  0      
  8  9  2  0      
  5  9  1  0      
 10 11  1  0      
 11 12  2  0      
 12  9  1  0      
 10 13  1  0      
 13 14  1  0      
 14 15  1  0      
 15 16  1  0      
 16 11  1  0      
 14 17  1  0      
 17 18  1  0      
 18 19  1  0      
 19 20  1  0      
 20 21  1  0      
 21 22  1  0      
  2 23  1  0      
 16 24  2  0      
 13 25  2  0      
 21 26  2  0      
M  END
