# Supplementary material for: Antioxidant and Anti-Inflammatory Activities of Barettin
Source: MDPI journal article supplement (doi:10.3390/md11072655), 2013-07-22
Supplement: s3 [file s3]

marinedrugs-11-02655-s002.mol
  corina  04141406413D 1   1.00000     0.00000 
CORINA 3.49 0023  12.04.2013
 25 27  0  0  0  0  0  0  0  0999 V2000
    0.2322    1.2144   -1.2202 C   0  0  0  0  0  0  0  0  0  0  0  0
    0.2046   -0.1395   -0.9194 C   0  0  0  0  0  0  0  0  0  0  0  0
    1.2919   -0.7508   -0.3337 C   0  0  0  0  0  0  0  0  0  0  0  0
    2.4305   -0.0081   -0.0390 C   0  0  0  0  0  0  0  0  0  0  0  0
    2.4566    1.3625   -0.3442 C   0  0  0  0  0  0  0  0  0  0  0  0
    1.3508    1.9672   -0.9360 C   0  0  0  0  0  0  0  0  0  0  0  0
    3.6446   -0.3294    0.5318 N   0  0  0  0  0  0  0  0  0  0  0  0
    4.4397    0.7702    0.6036 C   0  0  0  0  0  0  0  0  0  0  0  0
    3.7812    1.8484    0.0857 C   0  0  0  0  0  0  0  0  0  0  0  0
    6.5453    2.3947    0.0927 N   0  0  0  0  0  0  0  0  0  0  0  0
    5.6233    3.4558    0.0697 C   0  0  0  0  0  0  0  0  0  0  0  0
    4.2901    3.2180   -0.0218 C   0  0  0  0  0  0  0  0  0  0  0  0
    7.8086    2.6161    0.4898 C   0  0  0  0  0  0  0  0  0  0  0  0
    8.2854    3.9548    0.9622 C   0  0  0  0  0  0  0  0  0  0  0  0
    7.4038    5.0372    0.5501 N   0  0  0  0  0  0  0  0  0  0  0  0
    6.1396    4.8263    0.1475 C   0  0  0  0  0  0  0  0  0  0  0  0
    8.3703    3.9392    2.4897 C   0  0  0  0  0  0  0  0  0  0  0  0
    8.9738    5.2568    2.9804 C   0  0  0  0  0  0  0  0  0  0  0  0
    9.0587    5.2412    4.5080 C   0  0  0  0  0  0  0  0  0  0  0  0
    9.6366    6.5028    4.9778 N   0  0  0  0  0  0  0  0  0  0  0  0
    9.8117    6.7194    6.3241 C   0  0  0  0  0  0  0  0  0  0  0  0
   10.3541    7.9033    6.7651 N   0  0  0  0  0  0  0  0  0  0  0  0
    5.4269    5.7671   -0.1513 O   0  0  0  0  0  0  0  0  0  0  0  0
    8.5961    1.6937    0.4653 O   0  0  0  0  0  0  0  0  0  0  0  0
    9.4637    5.8024    7.1825 N   0  0  0  0  0  0  0  0  0  0  0  0
  1  2  2  0      
  2  3  1  0      
  3  4  2  0      
  4  5  1  0      
  5  6  2  0      
  6  1  1  0      
  4  7  1  0      
  7  8  1  0      
  8  9  2  0      
  5  9  1  0      
 10 11  1  0      
 11 12  2  0      
 12  9  1  0      
 10 13  1  0      
 13 14  1  0      
 14 15  1  0      
 15 16  1  0      
 16 11  1  0      
 14 17  1  0      
 17 18  1  0      
 18 19  1  0      
 19 20  1  0      
 20 21  1  0      
 21 22  1  0      
 16 23  2  0      
 13 24  2  0      
 21 25  2  0      
M  END
$$$$
