# Supplementary material for: Antioxidant and Anti-Inflammatory Activities of Barettin
Source: MDPI journal article supplement (doi:10.3390/md11072655), 2013-07-22
Supplement: s4 [file s4]

marinedrugs-11-02655-s002.mol
  ChemDraw01201408432D

 25 27  0  0  0  0  0  0  0  0999 V2000
   -5.0013    0.4125    0.0000 C   0  0  0  0  0  0  0  0  0  0  0  0
   -5.0013   -0.4125    0.0000 C   0  0  0  0  0  0  0  0  0  0  0  0
   -4.2868   -0.8250    0.0000 C   0  0  0  0  0  0  0  0  0  0  0  0
   -3.5724   -0.4125    0.0000 C   0  0  0  0  0  0  0  0  0  0  0  0
   -3.5724    0.4125    0.0000 C   0  0  0  0  0  0  0  0  0  0  0  0
   -4.2868    0.8250    0.0000 C   0  0  0  0  0  0  0  0  0  0  0  0
   -2.8579   -0.8250    0.0000 N   0  0  0  0  0  0  0  0  0  0  0  0
   -2.1434   -0.4125    0.0000 C   0  0  0  0  0  0  0  0  0  0  0  0
   -2.1434    0.4125    0.0000 C   0  0  0  0  0  0  0  0  0  0  0  0
   -0.7145   -0.4125    0.0000 N   0  0  0  0  0  0  0  0  0  0  0  0
   -0.7145    0.4125    0.0000 C   0  0  0  0  0  0  0  0  0  0  0  0
   -1.4289    0.8250    0.0000 C   0  0  0  0  0  0  0  0  0  0  0  0
    0.0000   -0.8250    0.0000 C   0  0  0  0  0  0  0  0  0  0  0  0
    0.7145   -0.4125    0.0000 C   0  0  0  0  0  0  0  0  0  0  0  0
    0.7145    0.4125    0.0000 N   0  0  0  0  0  0  0  0  0  0  0  0
    0.0000    0.8250    0.0000 C   0  0  0  0  0  0  0  0  0  0  0  0
    1.4289   -0.8250    0.0000 C   0  0  0  0  0  0  0  0  0  0  0  0
    2.1434   -0.4125    0.0000 C   0  0  0  0  0  0  0  0  0  0  0  0
    2.8579   -0.8250    0.0000 C   0  0  0  0  0  0  0  0  0  0  0  0
    3.5724   -0.4125    0.0000 N   0  0  0  0  0  0  0  0  0  0  0  0
    4.2868   -0.8250    0.0000 C   0  0  0  0  0  0  0  0  0  0  0  0
    5.0013   -0.4125    0.0000 N   0  0  0  0  0  0  0  0  0  0  0  0
    0.0000    1.6500    0.0000 O   0  0  0  0  0  0  0  0  0  0  0  0
    0.0000   -1.6500    0.0000 O   0  0  0  0  0  0  0  0  0  0  0  0
    4.2868   -1.6500    0.0000 N   0  0  0  0  0  0  0  0  0  0  0  0
  1  2  2  0      
  2  3  1  0      
  3  4  2  0      
  4  5  1  0      
  5  6  2  0      
  6  1  1  0      
  4  7  1  0      
  7  8  1  0      
  8  9  2  0      
  5  9  1  0      
 10 11  1  0      
 11 12  2  0      
 12  9  1  0      
 10 13  1  0      
 13 14  1  0      
 14 15  1  0      
 15 16  1  0      
 16 11  1  0      
 14 17  1  0      
 17 18  1  0      
 18 19  1  0      
 19 20  1  0      
 20 21  1  0      
 21 22  1  0      
 16 23  2  0      
 13 24  2  0      
 21 25  2  0      
M  END
